# Supplementary material for: Investigation of the Occurrence of Cyanotoxins in Lake Karaoun (Lebanon) by Mass Spectrometry, Bioassays and Molecular Methods
Source: MDPI journal article supplement (doi:10.3390/toxins13100716), 2021-10-10
Supplement: s1 [file s1]

# Supplementary Materials: Investigation of the Occurrence of Cyanotoxins in Lake Karaoun (Lebanon) by Mass Spectrometry, Bioassays and Molecular Methods

Noura Alice Hammoud, Sevasti-Kiriaki Zervou, Triantafyllos Kaloudis, Christophoros Christophoridis, Aikaterina Paraskevopoulou, Theodoros M. Triantis, Kamal Slim, Joanna Szpunar, Ali Fadel, Ryszard Lobinski and Anastasia Hiskia

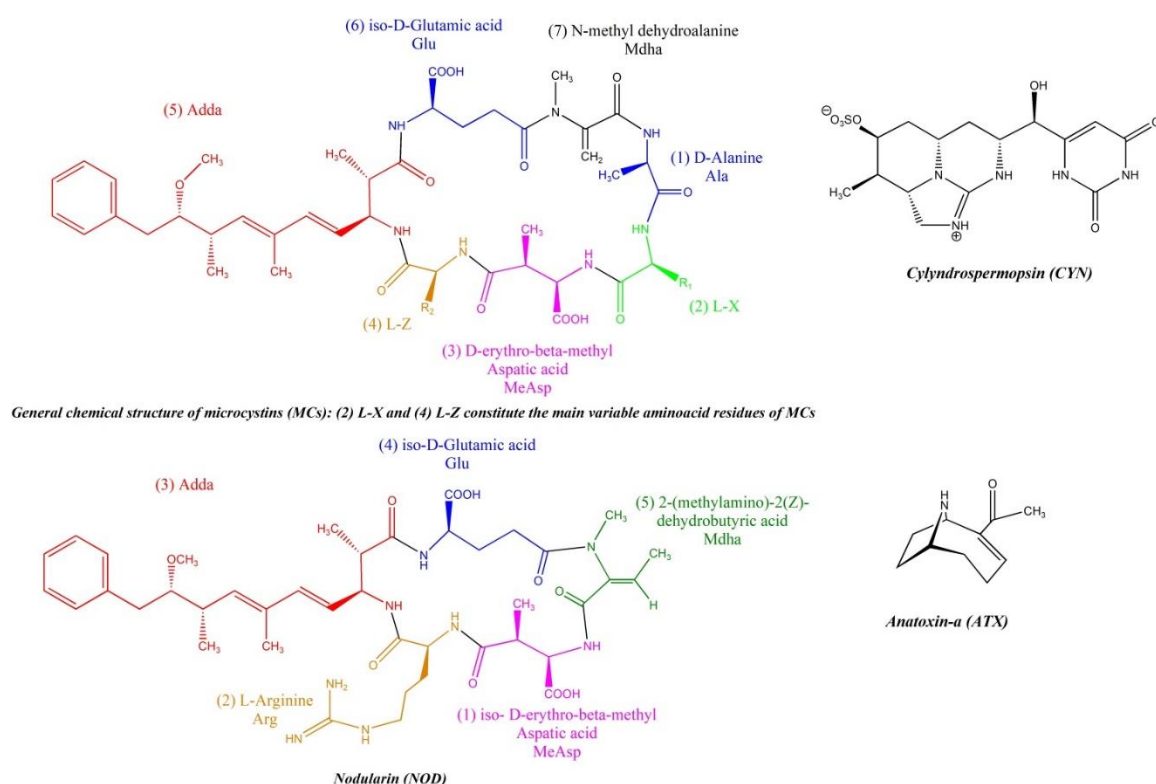

**Figure S1.** Chemical structures of studied cyanotoxins.

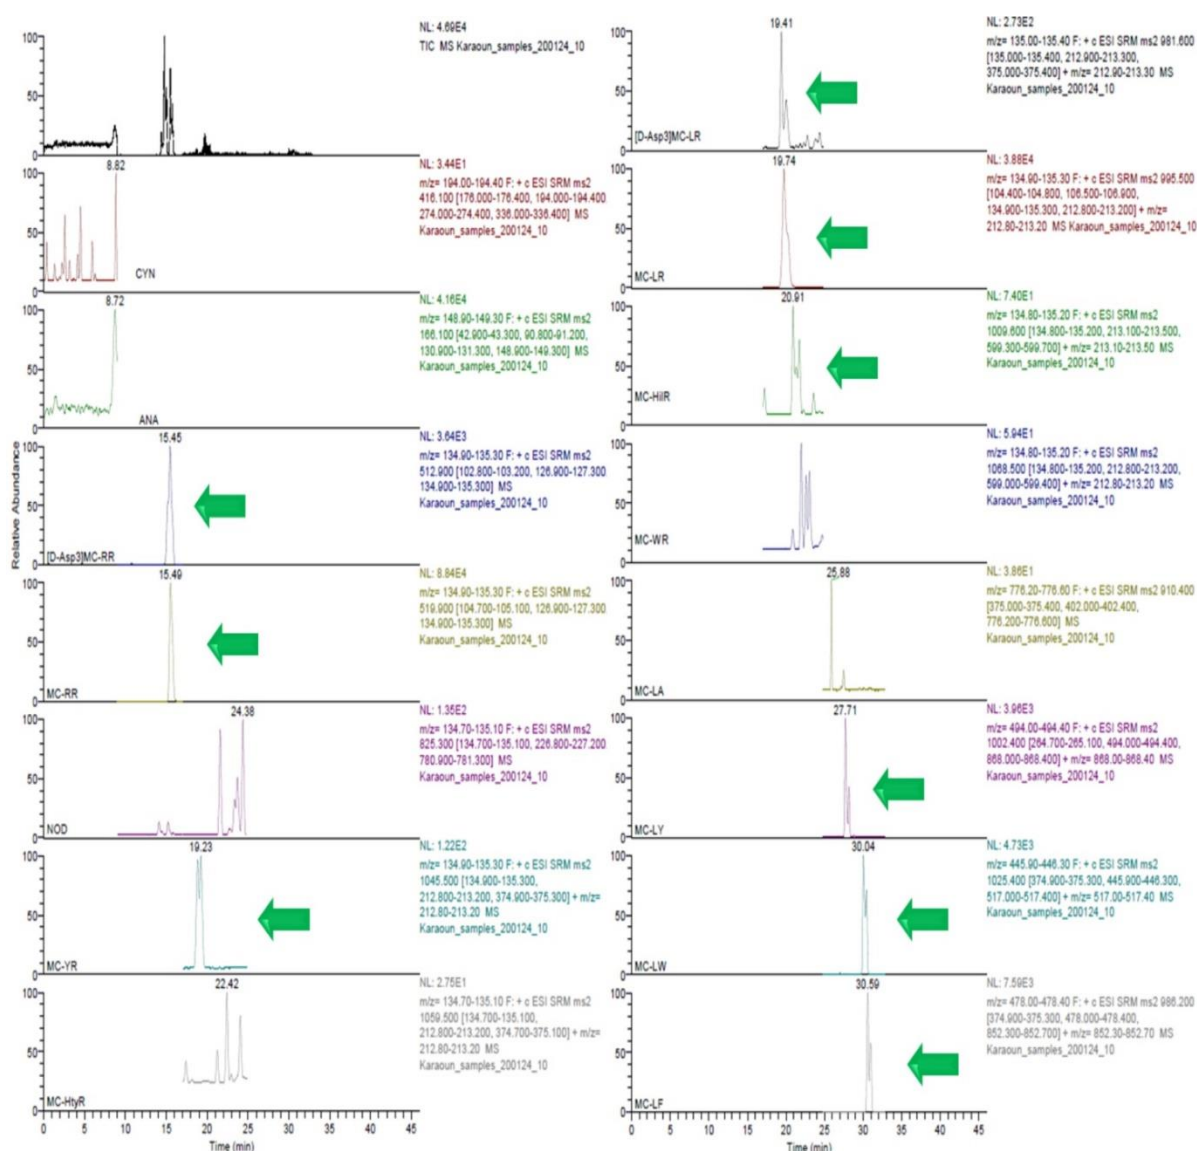

**Figure S2.** LC-MS/MS MRM chromatogram of sample S2, 02/10/2019 (intracellular fraction) from lake Karaoun.

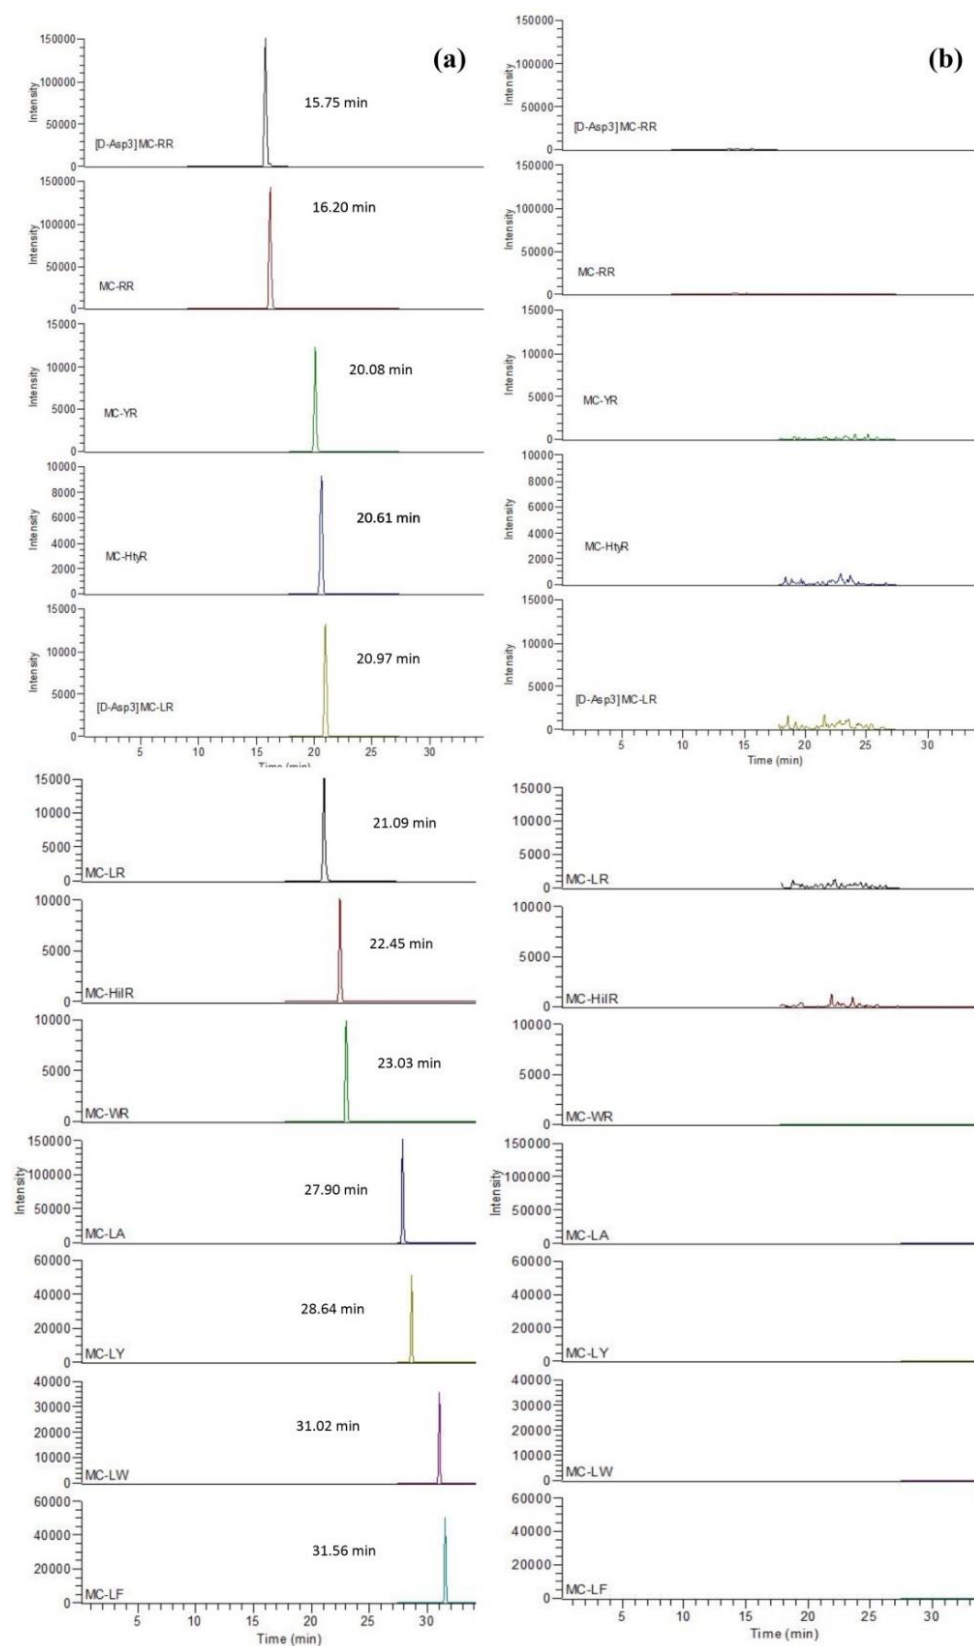

**Figure S3.** MRM chromatogram of (a) a standard solution of 12 MCs at a concentration level corresponding to 50 ng/g dw and (b) liver sample from *Cyprinus Carpio* fish collected in September 2019.

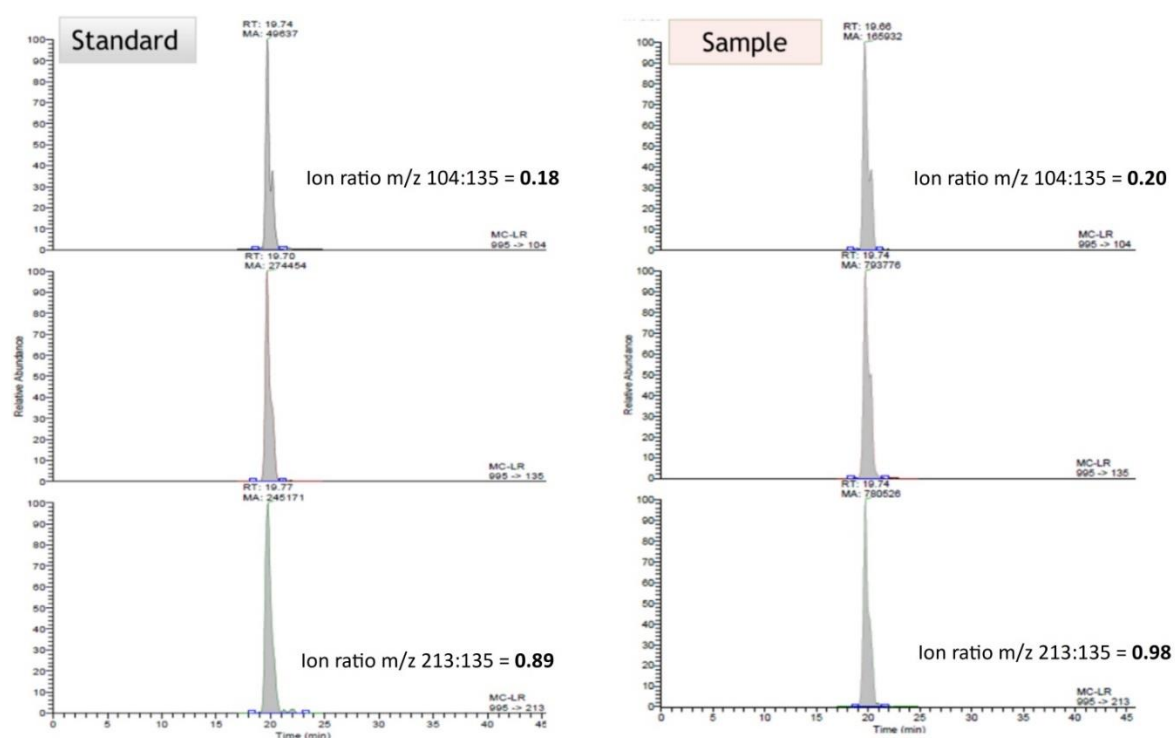

**Figure S4.** Example of identification of MC-LR in sample S2, 02/10/2019 (intracellular fraction) from lake Karaoun.

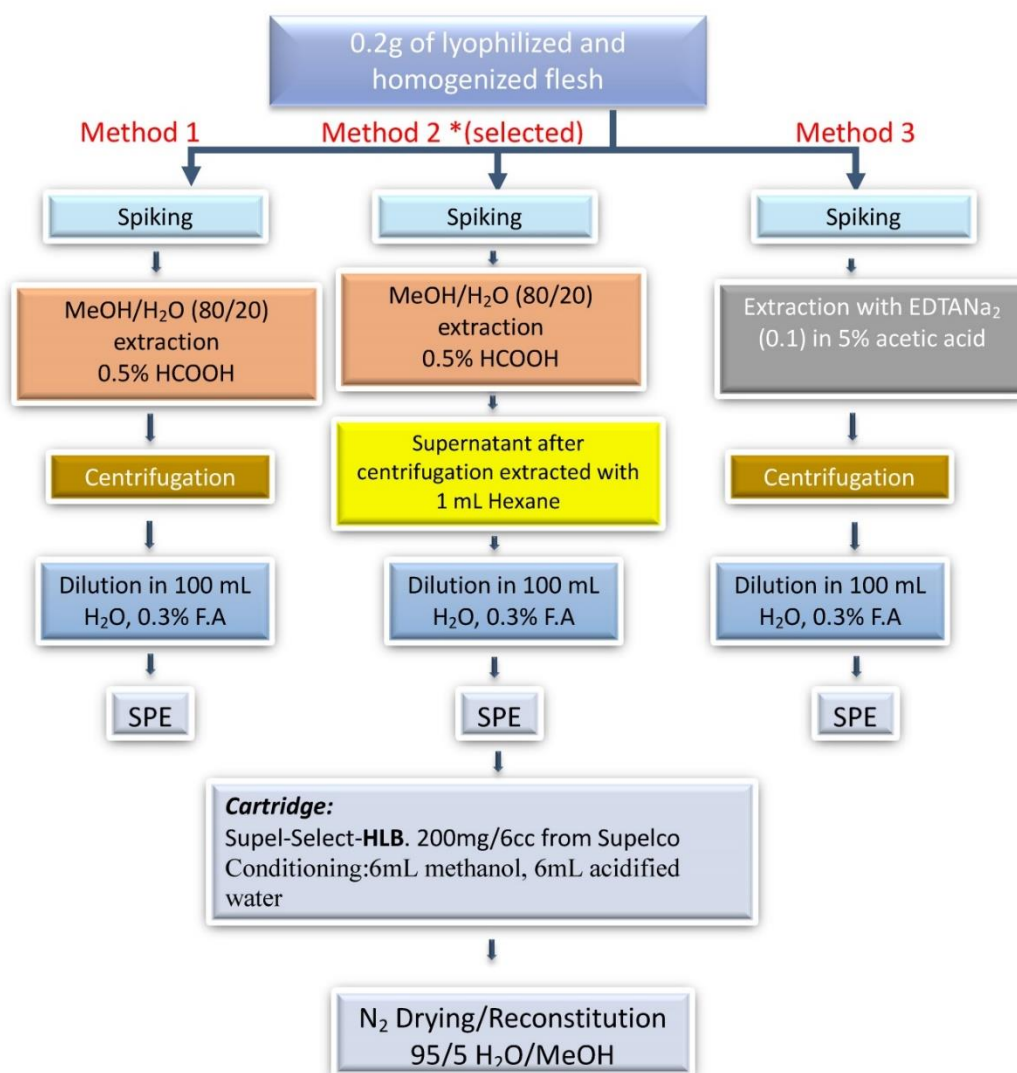

**Figure S5.** Experimental procedures tested in order to optimize the extraction of MCs in fish flesh.

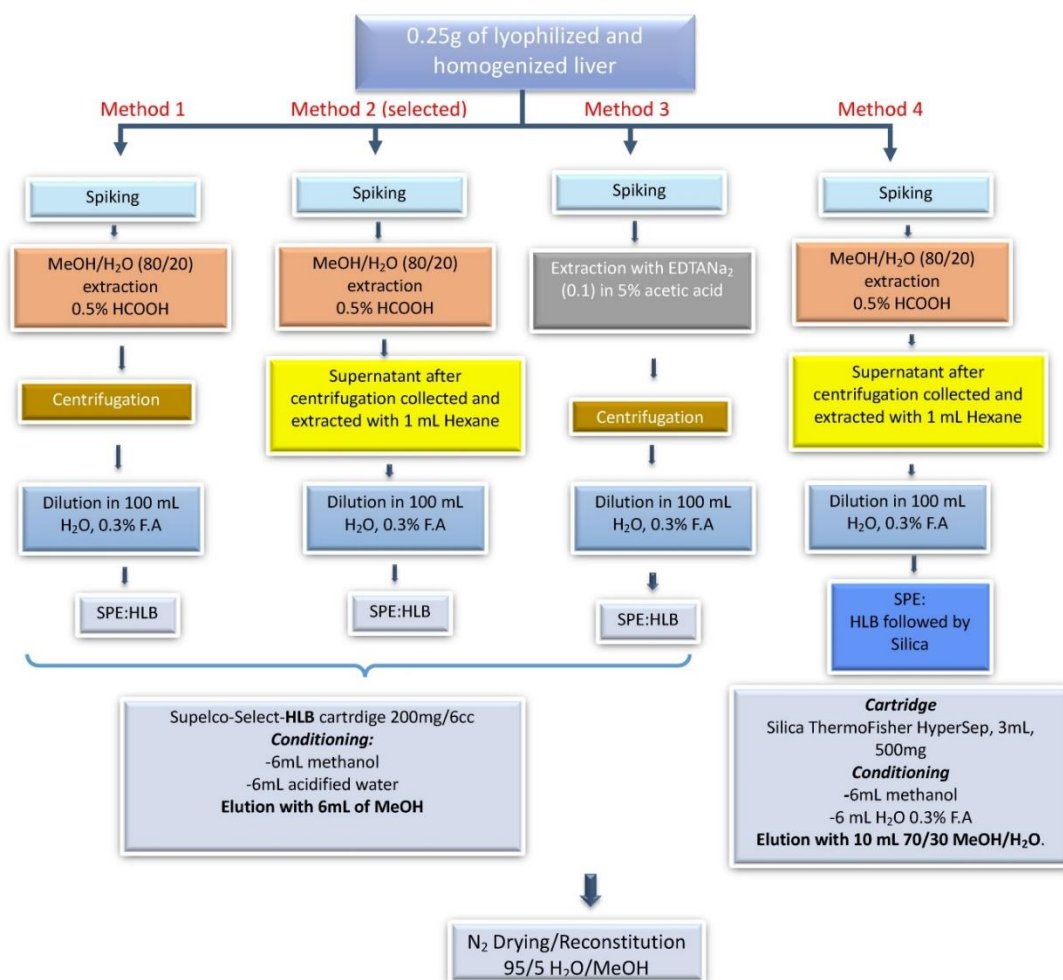

**Figure S6.** Experimental procedures tested in order to optimize the extraction of MCs in fish liver.

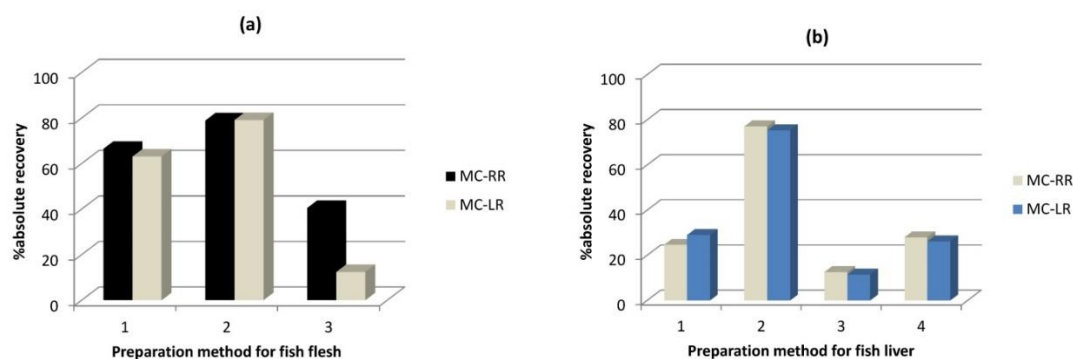

**Figure S7.** Selection of method for (a) fish flesh and (b) fish liver: obtained recoveries of spiked MCs using different treatment processes.

**Table S1.** Method LODs and LOQs for each cyanotoxin analysed in this study using LC-MS/MS.

| Cyanotoxin                 | Extracellular (µg/L) |       | Intracellular (µg/L)* |       |
|----------------------------|----------------------|-------|-----------------------|-------|
|                            | LOD                  | LOQ   | LOD                   | LOQ   |
| CYN                        | 0.001                | 0.003 | 0.010                 | 0.030 |
| ATX                        | 0.001                | 0.003 | 0.010                 | 0.030 |
| [D-Asp <sup>3</sup> ]MC-RR | 0.002                | 0.006 | 0.020                 | 0.060 |
| MC-RR                      | 0.001                | 0.003 | 0.010                 | 0.030 |
| NOD                        | 0.002                | 0.006 | 0.020                 | 0.060 |
| MC-YR                      | 0.004                | 0.013 | 0.040                 | 0.120 |
| MC-HtyR                    | 0.007                | 0.020 | 0.070                 | 0.210 |
| [D-Asp <sup>3</sup> ]MC-LR | 0.004                | 0.011 | 0.040                 | 0.120 |
| MC-LR                      | 0.004                | 0.013 | 0.040                 | 0.120 |
| MC-HiIR                    | 0.006                | 0.019 | 0.060                 | 0.180 |
| MC-WR                      | 0.006                | 0.017 | 0.060                 | 0.180 |
| MC-LA                      | 0.003                | 0.009 | 0.030                 | 0.090 |
| MC-LY                      | 0.006                | 0.018 | 0.060                 | 0.180 |
| MC-LW                      | 0.004                | 0.013 | 0.040                 | 0.120 |
| MC-LF                      | 0.005                | 0.016 | 0.050                 | 0.150 |

\* Limits of detection (LODs) for intracellular toxins altered based on the sample volume that passed through the filter. Limits reported in the table are referred when 150 mL of water sample passed through the filter.

**Table S2.** Results of untargeted HS-SPME-GC/MS screening per sample.

| No. | Sample ID<br>Sample details<br>Compound      | 1<br>S1, 22/8/2019 | 2<br>S2, 02/10/2019 | 3<br>S4, 02/10/2019 | 4<br>S1, 22/12/2019 | 5<br>S1, 15/01/2020 | 6<br>S4, 04/02/2020 | 7<br>S5, 15/02/2020 | 8<br>S5, 17/02/2020 | 9<br>S1, 22/02/2020 | 10<br>S2, 22/02/2020 | 11<br>S1, 15/04/2020 | 12<br>S2, 22/04/2020 | 13<br>S4, 22/04/2020 | 14<br>S1, 14/08/2020 | 15<br>S2, 14/08/2020 | 16<br>S3, 09/10/2020 |
|-----|----------------------------------------------|--------------------|---------------------|---------------------|---------------------|---------------------|---------------------|---------------------|---------------------|---------------------|----------------------|----------------------|----------------------|----------------------|----------------------|----------------------|----------------------|
| 1   | $\alpha$ -Thujene                            |                    |                     |                     |                     |                     |                     |                     |                     |                     |                      | *                    |                      |                      |                      |                      | *                    |
| 2   | 2,2,4,6,6-pentamethyl heptane                | *                  | *                   | *                   | *                   | *                   | *                   | *                   | *                   | *                   | *                    | *                    | *                    | *                    | *                    | *                    | *                    |
| 3   | 2,2,6-trimethyl-cyclohexanone                |                    |                     |                     |                     |                     |                     |                     |                     |                     |                      |                      | *                    |                      |                      |                      |                      |
| 4   | p-Cresol                                     |                    | *                   |                     |                     |                     |                     |                     |                     |                     |                      |                      | *                    |                      |                      |                      |                      |
| 5   | 2,4-Dimethyldecane                           |                    |                     |                     |                     |                     |                     |                     |                     |                     |                      |                      |                      | *                    |                      |                      |                      |
| 6   | Nonanal                                      |                    | *                   | *                   |                     |                     | *                   |                     | *                   | *                   |                      |                      |                      | *                    | *                    | *                    | *                    |
| 7   | 4,7-Dimethylundecane                         |                    |                     |                     |                     |                     |                     |                     |                     |                     |                      |                      |                      |                      |                      |                      | *                    |
| 8   | $\beta$ -Cyclocitral                         |                    | *                   |                     | *                   |                     |                     |                     |                     |                     |                      |                      |                      |                      |                      |                      | *                    |
| 9   | 2,6,6-Trimethyl-1-Cyclohexene-1-acetaldehyde |                    |                     |                     |                     |                     |                     |                     |                     |                     |                      |                      | *                    |                      |                      |                      |                      |
| 10  | 6,10-Dimethyl-5,9-Undecadien-2-one           |                    |                     |                     |                     |                     |                     |                     |                     |                     |                      |                      | *                    |                      |                      |                      |                      |
| 11  | $\beta$ -Ionone                              |                    |                     |                     | *                   |                     |                     |                     |                     |                     |                      |                      | *                    |                      |                      |                      | *                    |
| 12  | Pentadecane                                  |                    |                     |                     |                     |                     |                     |                     |                     |                     |                      |                      | *                    |                      |                      |                      |                      |
| 13  | 2,4-di-tert-butylphenol                      | *                  |                     | *                   | *                   |                     | *                   |                     | *                   | *                   |                      |                      |                      | *                    | *                    | *                    | *                    |
| 14  | Hexadecane                                   |                    |                     |                     |                     |                     |                     |                     |                     |                     |                      | *                    | *                    |                      |                      |                      |                      |
| 15  | Heptadecane                                  |                    |                     |                     |                     |                     |                     |                     |                     |                     |                      | *                    | *                    | *                    | *                    | *                    | *                    |
| 16  | Diisobutyl phtalate                          |                    |                     | *                   | *                   |                     |                     |                     |                     | *                   |                      | *                    |                      |                      |                      |                      |                      |
| 17  | Dimethyl disulfide                           |                    |                     |                     | *                   |                     |                     |                     |                     |                     |                      |                      |                      |                      |                      |                      |                      |
| 18  | Dimethyl trisulfide                          |                    |                     |                     | *                   |                     |                     |                     |                     |                     |                      |                      |                      |                      |                      |                      |                      |
| 19  | Dimethyl tetrasulfide                        |                    |                     |                     | *                   |                     |                     |                     |                     |                     |                      |                      |                      |                      |                      |                      |                      |
| 20  | 3-methylindole                               |                    | *                   |                     | *                   |                     |                     |                     |                     |                     |                      |                      |                      |                      |                      |                      |                      |

\* Identified compounds.



**Table S3.** LC-MS/MS detection parameters of targeted cyanotoxins (Zervou et al, 2017\*).

| Cyanotoxin        | tR (min) | Precursor ion<br>(m/z)        | Product ion Q1<br>(m/z) | Product ion Q2<br>(m/z) | Product ion Q3<br>(m/z) | [Q2]/[Q1]<br>(%RSD) | [Q3]/[Q1]<br>(%RSD) |
|-------------------|----------|-------------------------------|-------------------------|-------------------------|-------------------------|---------------------|---------------------|
| CYN               | 2.10     | 416.1<br>[M+H] <sup>+</sup>   | 194                     | 336                     | 176                     | 0.39 (1.9)          | 0.32 (3.0)          |
| ATX               | 2.96     | 166.1<br>[M+H] <sup>+</sup>   | 149                     | 131                     | 91                      | 0.72 (2.2)          | 0.30 (3.4)          |
| [D-Asp3]<br>MC-RR | 15.25    | 512.9<br>[M+2H] <sup>2+</sup> | 135                     | 103                     | 127                     | 0.42 (1.9)          | 0.34 (2.4)          |
| MC-RR             | 15.57    | 519.9<br>[M+2H] <sup>2+</sup> | 135                     | 105                     | 127                     | 0.39 (4.4)          | 0.35 (5.5)          |
| NOD               | 17.42    | 825.3<br>[M+H] <sup>+</sup>   | 135                     | 227                     | 781                     | 0.78 (7.2)          | 0.13 (13.0)         |
| MC-YR             | 18.81    | 1045.2<br>[M+H] <sup>+</sup>  | 213                     | 135                     | 375                     | 1.00 (19.5)         | 0.62 (24.0)         |
| MC-HtyR           | 19.29    | 1059.5<br>[M+H] <sup>+</sup>  | 135                     | 213                     | 375                     | 0.91 (16.3)         | 0.32 (25.4)         |
| [D-Asp3]<br>MC-LR | 19.58    | 981.6<br>[M+H] <sup>+</sup>   | 213                     | 135                     | 375                     | 0.96 (11.8)         | 0.77 (14.3)         |
| MC-LR             | 19.72    | 995.5<br>[M+H] <sup>+</sup>   | 135                     | 213                     | 105                     | 0.82 (19.5)         | 0.17 (35.6)         |
| MC-HilR           | 21.31    | 1009.6<br>[M+H] <sup>+</sup>  | 135                     | 213                     | 599                     | 0.67 (7.9)          | 0.43 (22.5)         |
| MC-WR             | 22.03    | 1068.5<br>[M+H] <sup>+</sup>  | 213                     | 135                     | 599                     | 0.48 (25.7)         | 0.35 (47.2)         |
| MC-LA             | 27.06    | 910.4<br>[M+H] <sup>+</sup>   | 776                     | 375                     | 402                     | 0.57 (7.7)          | 0.57 (6.9)          |
| MC-LY             | 27.84    | 1002.4<br>[M+H] <sup>+</sup>  | 868                     | 265                     | 494                     | 0.83 (8.7)          | 0.81 (15.0)         |
| MC-LW             | 30.15    | 1025.4<br>[M+H] <sup>+</sup>  | 517                     | 375                     | 446                     | 1.17 (30.6)         | 0.92 (23.1)         |
| MC-LF             | 30.67    | 986.2<br>[M+H] <sup>+</sup>   | 853                     | 478                     | 375                     | 0.95 (16.9)         | 0.44 (17.6)         |

\* Zervou, S.-K.; Christophoridis, C.; Kaloudis, T.; Triantis, T.M.; Hiskia, A. New SPE-LC MS/MS method for simultaneous determination of multi-class cyanobacterial and algal toxins. *Journal of Hazardous Materials* **2017**, *323*, 56–66, <https://doi.org/10.1016/j.jhazmat.2016.07.020>.

**Table S4.** Performance characteristics of the method for the analysis of target MCs in fish flesh and liver.

| <b>Fish Flesh</b>   | <b>[D-Asp<sup>3</sup>]<br/>MC-RR</b> | <b>MC-RR</b> | <b>MC-YR</b> | <b>MC-HtyR</b> | <b>[D-Asp<sup>3</sup>]<br/>MC-LR</b> | <b>MC-LR</b> | <b>MC-HilR</b> | <b>MC-WR</b> | <b>MC-LA</b> | <b>MC-LY</b> | <b>MC-LW</b> | <b>MC-LF</b> |
|---------------------|--------------------------------------|--------------|--------------|----------------|--------------------------------------|--------------|----------------|--------------|--------------|--------------|--------------|--------------|
| LOD flesh (ng/g dw) | 2.0                                  | 1.0          | 4.0          | 7.0            | 4.0                                  | 4.0          | 6.0            | 6.0          | 3.0          | 6.0          | 4.0          | 5.0          |
| LOQ flesh (ng/g dw) | 6.0                                  | 3.0          | 12.0         | 21.0           | 12.0                                 | 12.0         | 18.0           | 18.0         | 9.0          | 18.0         | 12.0         | 15.0         |
| % Recovery          | 80.4                                 | 81.6         | 76.8         | 45.6           | 72.5                                 | 78.8         | 68.5           | 10.5         | 75.4         | 76.8         | 22.2         | 29.5         |
| intra-day % rsd     | 7.4                                  | 6.8          | 11.4         | 11.2           | 11.2                                 | 12.2         | 16.5           | 26.5         | 6.5          | 5.6          | 23.4         | 13.5         |
| <b>Fish Liver</b>   | <b>[D-Asp<sup>3</sup>]<br/>MC-RR</b> | <b>MC-RR</b> | <b>MC-YR</b> | <b>MC-HtyR</b> | <b>[D-Asp<sup>3</sup>]<br/>MC-LR</b> | <b>MC-LR</b> | <b>MC-HilR</b> | <b>MC-WR</b> | <b>MC-LA</b> | <b>MC-LY</b> | <b>MC-LW</b> | <b>MC-LF</b> |
| LOD liver (ng/g dw) | 1.6                                  | 0.8          | 3.2          | 5.6            | 3.2                                  | 3.2          | 4.8            | 4.8          | 2.4          | 4.8          | 3.2          | 4.0          |
| LOQ liver (ng/g dw) | 4.8                                  | 2.4          | 9.6          | 16.8           | 9.6                                  | 9.6          | 14.4           | 14.4         | 7.2          | 14.4         | 9.6          | 12.0         |
| % Recovery          | 65.5                                 | 71.8         | 71.2         | 39.9           | 69.5                                 | 70.4         | 61.5           | 5.5          | 72.2         | 70.1         | 19.2         | 16.5         |
| intra-day % rsd     | 12.2                                 | 11.1         | 5.5          | 10.3           | 14.4                                 | 15.2         | 15.5           | 28.4         | 9.5          | 12.2         | 30.2         | 33.1         |

**Table S5.** Physicochemical parameters of Lake Karaoun.

| <b>Sampling Date</b>                      | <b>Aug-19</b> | <b>Sep-19</b> | <b>Feb-20</b> | <b>Mar-20</b> | <b>Apr-20</b> | <b>Aug-20</b> |
|-------------------------------------------|---------------|---------------|---------------|---------------|---------------|---------------|
| <b>Concentration (mg/L)</b>               |               |               |               |               |               |               |
| Nitrate-nitrogen (NO <sub>3</sub> -N)     | 2.71          | 0.56          | 3.39          | 16.72         | 6.01          | -             |
| Nitrite-nitrogen (NO <sub>2</sub> -N)     | -             | -             | 0.28          | 0.06          | 0.03          | 0.02          |
| Phosphate-phosphorus (PO <sub>4</sub> -P) | -             | -             | 0.10          | 0.16          | 0.08          | 0.04          |
